# Supplementary material for: Bacterial Colony Phenotyping with Hyperspectral Elastic Light Scattering Patterns
Source: Sensors (Basel). 2023 Mar 27;23(7):3485. doi: 10.3390/s23073485 (PMC10098818; doi:10.3390/s23073485)
Supplement: Supplementary file 1 [file sensors-23-03485-s001.zip › sensors-2239522-supplementary.pdf]

# **Bacterial colony phenotyping with hyperspectral elastic light scattering patterns**

Iyll-Joon Doh<sup>1</sup>, Diana Vanessa Sarria Zuniga<sup>2</sup>, Sungho Shin<sup>3</sup>, Robert E. Pruitt<sup>2</sup>, Bartek Rajwa<sup>4</sup>, J.  
Paul Robinson<sup>3,5</sup>, and Euiwon Bae<sup>1\*</sup>

<sup>1</sup>Applied Optics Laboratory, School of Mechanical Engineering, Purdue University, West Lafayette, Indiana, 47907, USA;

<sup>2</sup>Botany and Plant Pathology, Purdue University, West Lafayette, Indiana, 47907, USA;

<sup>3</sup>Basic Medical Sciences, College of Veterinary Medicine, Purdue University, West Lafayette, Indiana, 47907, USA;

<sup>4</sup>Bindley Bioscience Center, Purdue University, West Lafayette, Indiana, 47907, USA;

<sup>5</sup>Weldon School of Biomedical Engineering, Purdue University, West Lafayette, Indiana, 47907, USA

\* Corresponding author

E-mail: ebae@purdue.edu (EB)

# SUPPLEMENTARY SECTION

**Table S1. The power of the diffracted beam with respect to the wavelength.**

| <b>Wavelength<br/>(nm)</b> | <b>Drive<br/>Frequency<br/>(MHz)</b> | <b>Power<br/>(<math>\mu</math>W)</b> |
|----------------------------|--------------------------------------|--------------------------------------|
| 715.43                     | 100                                  | 225.7                                |
| 685.89                     | 105                                  | 249.2                                |
| 659.38                     | 110                                  | 260.3                                |
| 635.45                     | 115                                  | 225.7                                |
| 613.76                     | 120                                  | 161.9                                |
| 593.99                     | 125                                  | 120.7                                |
| 575.91                     | 130                                  | 106.9                                |
| 559.3                      | 135                                  | 94.3                                 |
| 544                        | 140                                  | 80.5                                 |
| 529.85                     | 145                                  | 70.3                                 |
| 516.74                     | 150                                  | 60.1                                 |
| 504.54                     | 155                                  | 59.6                                 |
| 493.17                     | 160                                  | 68.5                                 |
| 482.55                     | 165                                  | 57.9                                 |
| 472.6                      | 170                                  | 30.98                                |
| 463.26                     | 175                                  | 21.5                                 |
| 454.48                     | 180                                  | 22.34                                |

The overall power of the beam at VIS, reflected from the cold mirror, was measured at 65.6 mW.

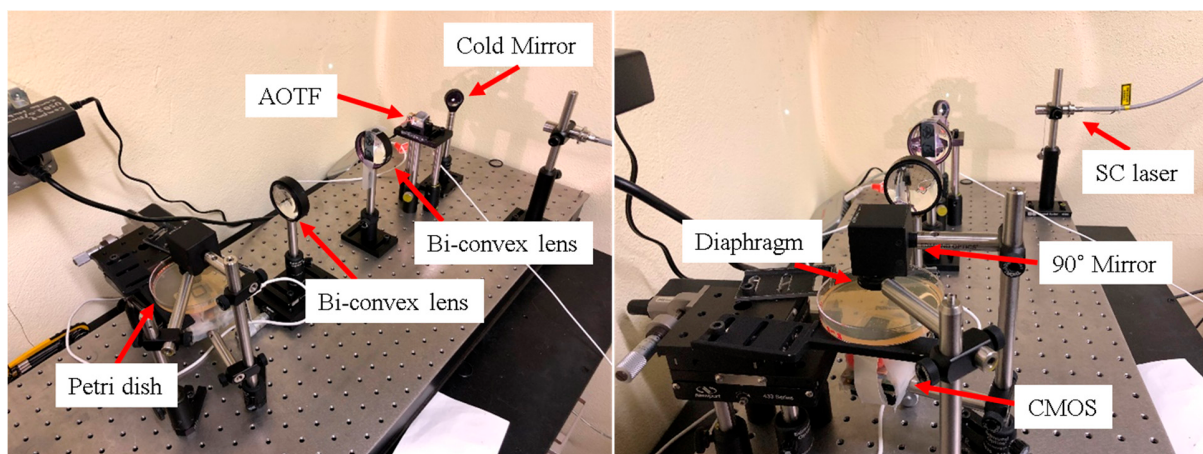

**Figure S1. The experiment setup for the hyperspectral elastic light scatter phenotyping instrument (HESPI).**

The picture of HESPI with the optical component are presented. As shown in the pictures, the bi-convex lenses were placed after the AOTF, and these components lay on the same axis. Owing to the position of the lenses, the size of the overall setup became about 25 inches long.

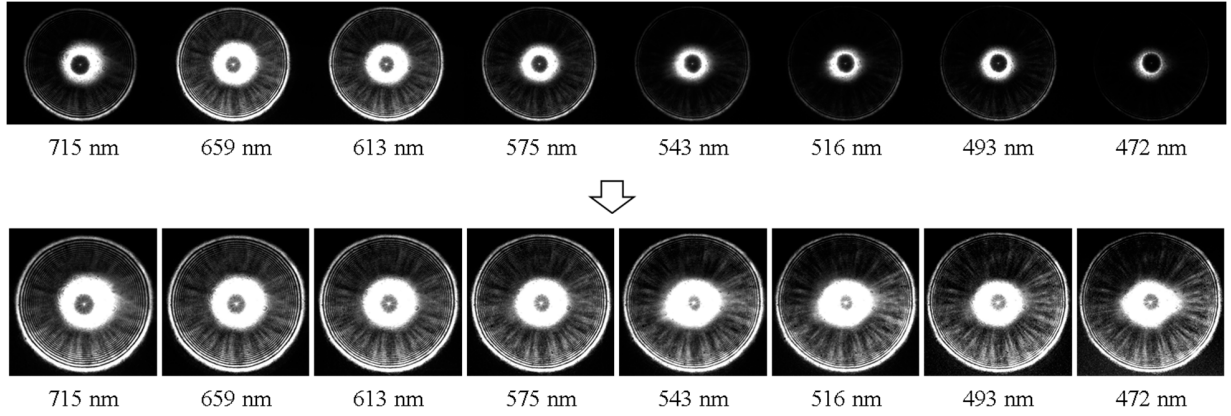

**Figure S2. The contrast adjustment of the light scattering pattern for the intensity compensation.**

For the image-processing, a contrast stretching function in MATLAB, “`imadjust()`” was utilized. The intensity values of each pattern image were adjusted to fill the entire dynamic range by stretching them based on the pattern image with the highest intensity. The dynamic range was set between 0 and the maximum intensity, adjusted by the ratio between the input image and the image with the highest intensity. Next, the lower and upper values of the input image were made to span the full dynamic range. All other intermediate values were reassigned to new intensity values according to the following formula.

$$g(x, y) = \frac{f(x, y) - f_{\min}}{f_{\max} - f_{\min}} \times 2^{bit}$$

Where  $g(x, y)$  is the adjusted pixel value;  $f(x, y)$  is input pixel value;  $f_{\max}$  and  $f_{\min}$  are upper and lower intensity values. The image was 8-bit gray scale image.

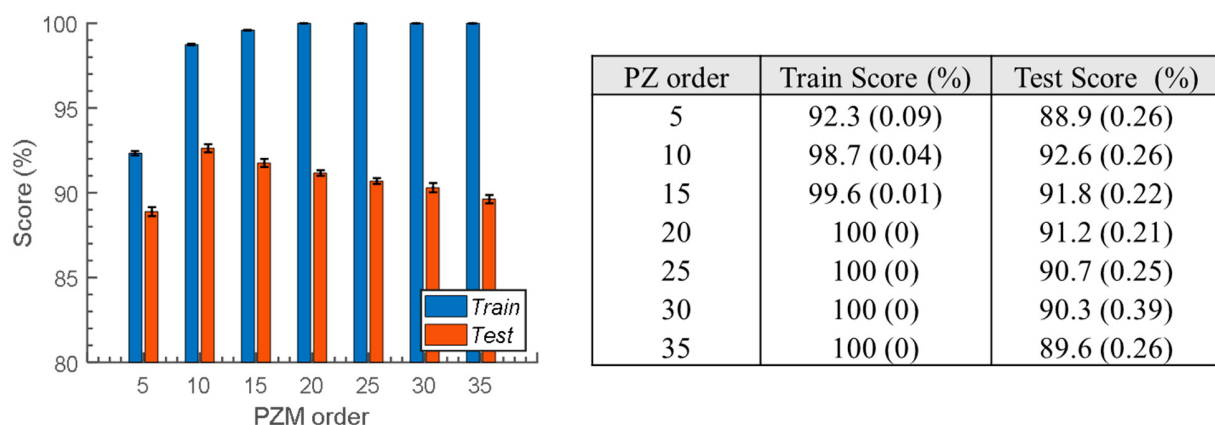

**Figure S3. The classification scores of the SVM-classifier with respect to the order of PZM (n=10).**

The classification scores were the means of the true positive rates, and the overall average across the wavelengths was calculated. A linear SVM was utilized for the classifier since it has been traditionally used for the analysis of the ELS pattern. The order ranged from 5 to 35 with an increment of 5.

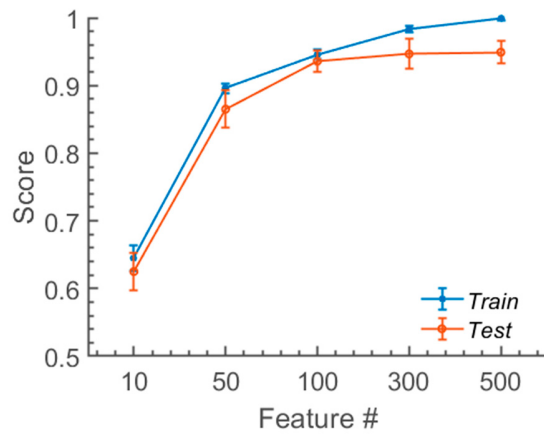

**Figure S4. The classification score in relation to the number of features selected from the univariate feature selection.**

Five different numbers of features were tested to determine the optimal number of features filtered from the univariate feature selection, specifically 10, 50, 100, 300, and 500 features. As shown on the graph, the training score increases as the number of features increases, while the test score reaches its peak when the number of features reaches 300. The error bar represents the standard deviation of 5 samples.

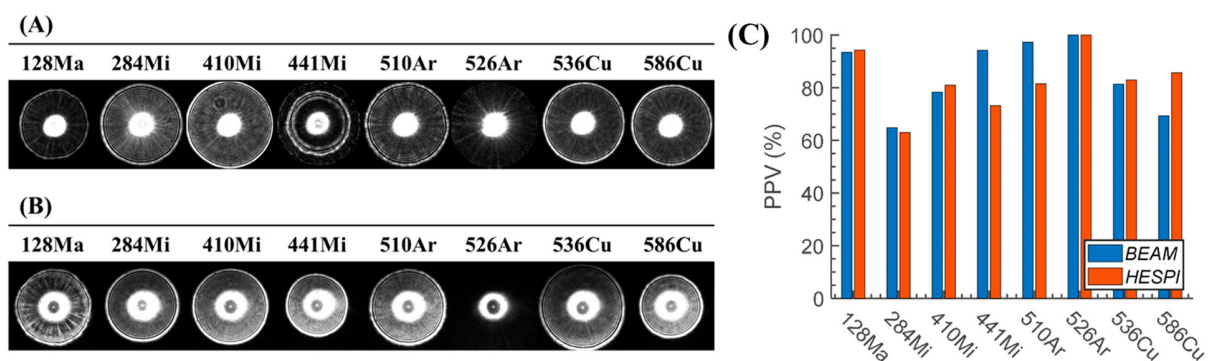

**Figure S5. The classification of the sample bacteria using single wavelength method.**

The representative light-scatter patterns of the bacteria collected from lettuce were measured using (A) a commercial ELS device (BEAM) and (B) HESPI with only a 635nm laser. Note that the incubation time was different. Panel (C) represents the classification result of 8 lettuce bacteria using only their 635-nm scattering pattern is presented. The 635-nm scattering patterns were measured using BEAM and HESPI. The result is given in positive predictive values (PPV) for each.

**Table S2. The classification result is given in PPV for each wavelength. Green represents good, while red represents poor efficiency.**

| Wavelength (nm) | 128Ma  | 284Mi  | 410Mi  | 441Mi  | 510Ar  | 526Ar  | 536Cu  | 586Cu  |
|-----------------|--------|--------|--------|--------|--------|--------|--------|--------|
| 709             | 0.9118 | 0.8447 | 0.7890 | 0.9091 | 0.9551 | 0.9804 | 0.9787 | 0.9890 |
| 703             | 0.9159 | 0.8269 | 0.8447 | 0.8496 | 0.9892 | 1.0000 | 1.0000 | 0.9667 |
| 697             | 0.9065 | 0.8842 | 0.8396 | 0.7750 | 0.9892 | 0.9901 | 0.9889 | 0.9091 |
| 692             | 0.9327 | 0.8835 | 0.8713 | 0.8174 | 0.9892 | 1.0000 | 0.9468 | 0.9333 |
| 686             | 0.9151 | 0.8627 | 0.8889 | 0.8136 | 0.9894 | 1.0000 | 0.9674 | 0.9438 |
| 681             | 0.9510 | 0.8713 | 0.8364 | 0.8250 | 1.0000 | 1.0000 | 0.9778 | 0.9882 |
| 675             | 0.9208 | 0.8333 | 0.8529 | 0.8291 | 0.9891 | 1.0000 | 0.9783 | 0.9773 |
| 670             | 0.9118 | 0.8235 | 0.7909 | 0.8435 | 1.0000 | 1.0000 | 0.9890 | 0.9886 |
| 665             | 0.9208 | 0.8019 | 0.8073 | 0.8348 | 1.0000 | 1.0000 | 0.9674 | 0.9884 |
| 660             | 0.9485 | 0.8000 | 0.8269 | 0.8496 | 0.9785 | 1.0000 | 0.9574 | 0.9775 |
| 655             | 0.9184 | 0.8700 | 0.8447 | 0.8362 | 0.9684 | 1.0000 | 0.9485 | 0.9560 |
| 650             | 0.9175 | 0.8095 | 0.8252 | 0.8649 | 0.9894 | 1.0000 | 0.9381 | 0.9570 |
| 645             | 0.9474 | 0.8037 | 0.7636 | 0.8584 | 0.9667 | 1.0000 | 0.9684 | 0.9667 |
| 640             | 0.9200 | 0.8039 | 0.8095 | 0.8649 | 0.9789 | 1.0000 | 0.9574 | 0.9785 |
| 636             | 0.9010 | 0.8165 | 0.8713 | 0.8571 | 0.9785 | 1.0000 | 0.9785 | 0.9780 |
| 631             | 0.9388 | 0.8273 | 0.8317 | 0.8559 | 0.9684 | 1.0000 | 0.9677 | 0.9565 |
| 627             | 0.9010 | 0.8200 | 0.7944 | 0.8435 | 0.9787 | 1.0000 | 0.9570 | 0.9667 |
| 622             | 0.8922 | 0.8113 | 0.8182 | 0.8496 | 0.9785 | 1.0000 | 0.9462 | 0.9468 |
| 618             | 0.9100 | 0.7982 | 0.8280 | 0.8348 | 0.9588 | 1.0000 | 0.9583 | 0.9667 |
| 614             | 0.9388 | 0.8173 | 0.8542 | 0.8571 | 0.9697 | 1.0000 | 0.9684 | 0.9167 |
| 610             | 0.9184 | 0.7963 | 0.8421 | 0.8818 | 0.9700 | 1.0000 | 0.9579 | 0.9468 |
| 606             | 0.9278 | 0.8302 | 0.8660 | 0.8696 | 0.9592 | 1.0000 | 0.9485 | 0.9778 |
| 602             | 0.9223 | 0.8673 | 0.8542 | 0.8534 | 0.9314 | 1.0000 | 0.9681 | 0.9780 |
| 598             | 0.9208 | 0.8713 | 0.9175 | 0.8750 | 0.9505 | 1.0000 | 0.9574 | 0.9468 |
| 594             | 0.8942 | 0.8431 | 0.8725 | 0.8829 | 0.9894 | 1.0000 | 0.9579 | 0.9565 |
| 590             | 0.9314 | 0.8700 | 0.8738 | 0.8850 | 0.9592 | 1.0000 | 0.9674 | 0.9674 |
| 586             | 0.8932 | 0.8696 | 0.8611 | 0.8305 | 0.9691 | 1.0000 | 0.9570 | 0.9663 |
| 583             | 0.9223 | 0.8529 | 0.8846 | 0.8621 | 0.9684 | 1.0000 | 0.9670 | 0.9663 |
| 579             | 0.9684 | 0.8854 | 0.8598 | 0.8333 | 0.9293 | 1.0000 | 0.9681 | 0.9663 |
| 576             | 0.9135 | 0.8600 | 0.8824 | 0.8727 | 0.9479 | 1.0000 | 0.9362 | 0.9362 |
| 572             | 0.9688 | 0.8889 | 0.9100 | 0.8376 | 0.9307 | 1.0000 | 0.9479 | 0.9560 |
| 569             | 0.9691 | 0.8958 | 0.8952 | 0.8522 | 0.9400 | 1.0000 | 0.9574 | 0.9570 |
| 565             | 0.9300 | 0.8788 | 0.9126 | 0.8584 | 0.9216 | 1.0000 | 0.9674 | 0.9560 |
| 562             | 0.9787 | 0.9043 | 0.9057 | 0.8761 | 0.9091 | 1.0000 | 0.9388 | 0.9583 |
| 559             | 0.9792 | 0.8763 | 0.9314 | 0.8696 | 0.9327 | 1.0000 | 0.9787 | 0.9457 |
| 556             | 0.9500 | 0.8654 | 0.9505 | 0.9340 | 0.9216 | 1.0000 | 0.9674 | 0.9474 |
| 553             | 0.9688 | 0.8558 | 0.9238 | 0.9151 | 0.9505 | 1.0000 | 0.9579 | 0.9677 |
| 550             | 0.9794 | 0.8911 | 0.9327 | 0.9434 | 0.9412 | 1.0000 | 0.9787 | 0.9583 |
| 547             | 0.9897 | 0.8725 | 0.9505 | 0.9259 | 0.9900 | 1.0000 | 0.9490 | 0.9468 |
| 544             | 0.9898 | 0.8922 | 0.9802 | 0.8761 | 0.9800 | 1.0000 | 0.9792 | 0.9778 |
| 541             | 0.9897 | 0.8713 | 0.9706 | 0.8839 | 0.9706 | 1.0000 | 0.9792 | 0.9667 |
| 538             | 1.0000 | 0.8416 | 0.9519 | 0.8899 | 0.9900 | 1.0000 | 0.9691 | 0.9355 |
| 535             | 0.9898 | 0.8431 | 0.9796 | 0.9245 | 0.9899 | 1.0000 | 0.9400 | 0.8969 |
| 532             | 1.0000 | 0.8529 | 0.9608 | 0.9252 | 0.9612 | 1.0000 | 0.9688 | 0.9457 |
| 529             | 1.0000 | 0.8788 | 0.9612 | 0.9009 | 0.9804 | 1.0000 | 0.9691 | 0.9457 |
| 527             | 0.9898 | 0.8515 | 0.9612 | 0.9174 | 0.9340 | 1.0000 | 0.9780 | 0.9348 |
| 524             | 1.0000 | 0.8866 | 0.9340 | 0.9091 | 0.9804 | 1.0000 | 0.9789 | 0.9355 |
| 522             | 1.0000 | 0.8788 | 0.9596 | 0.9091 | 0.9615 | 1.0000 | 0.9490 | 0.9457 |
| 519             | 0.9798 | 0.9010 | 0.9802 | 0.9091 | 0.9789 | 1.0000 | 0.9200 | 0.9468 |
| 516             | 1.0000 | 0.8911 | 0.9706 | 0.9009 | 0.9596 | 1.0000 | 0.9286 | 0.9560 |
| 514             | 0.9898 | 0.8922 | 0.9596 | 0.9259 | 0.9804 | 1.0000 | 0.9583 | 0.9474 |
| 511             | 0.9694 | 0.9091 | 0.9700 | 0.9346 | 0.9417 | 1.0000 | 0.9278 | 0.9271 |
| 509             | 0.9694 | 0.8545 | 0.9703 | 0.9434 | 0.9510 | 1.0000 | 0.9677 | 0.9556 |
| 507             | 0.9588 | 0.9208 | 0.9703 | 0.9009 | 0.9314 | 1.0000 | 0.9468 | 0.9362 |
| 504             | 0.9505 | 0.9184 | 0.9615 | 0.9174 | 0.9583 | 0.9804 | 0.9574 | 0.9271 |
| 502             | 0.9394 | 0.9072 | 0.9608 | 0.9174 | 0.9208 | 1.0000 | 0.9574 | 0.9388 |
| 500             | 0.9175 | 0.8800 | 0.9510 | 0.9000 | 0.9118 | 1.0000 | 0.9574 | 0.9579 |
| 497             | 0.9200 | 0.8687 | 0.9608 | 0.9151 | 0.9192 | 1.0000 | 0.9474 | 0.9091 |
| 495             | 0.9126 | 0.8627 | 0.9510 | 0.8972 | 0.9468 | 1.0000 | 0.9474 | 0.9175 |
| 493             | 0.8932 | 0.8447 | 0.9406 | 0.8818 | 0.9263 | 1.0000 | 0.9474 | 0.9355 |
| 491             | 0.9057 | 0.8173 | 0.9412 | 0.8972 | 0.9659 | 1.0000 | 0.9381 | 0.9167 |
| 489             | 0.9151 | 0.9158 | 0.9423 | 0.8879 | 0.9468 | 1.0000 | 0.9375 | 0.8878 |
| 487             | 0.9065 | 0.8900 | 0.9798 | 0.8879 | 0.9394 | 1.0000 | 0.9674 | 0.8958 |
| 485             | 0.9020 | 0.8350 | 0.9500 | 0.8704 | 0.9362 | 1.0000 | 0.9479 | 0.9072 |
| 483             | 0.9208 | 0.8476 | 0.9381 | 0.9238 | 0.9200 | 1.0000 | 0.9677 | 0.9192 |
| 481             | 0.9223 | 0.8713 | 0.9505 | 0.9143 | 0.9184 | 1.0000 | 0.9574 | 0.9082 |
| 479             | 0.8932 | 0.7981 | 0.9118 | 0.9009 | 0.9457 | 1.0000 | 0.9684 | 0.9462 |
| 477             | 0.9118 | 0.8515 | 0.9126 | 0.9074 | 0.9457 | 1.0000 | 0.9381 | 0.9485 |
| 475             | 0.8922 | 0.8462 | 0.9500 | 0.9174 | 0.9468 | 1.0000 | 0.9574 | 0.9588 |
| 473             | 0.9388 | 0.8476 | 0.9515 | 0.9174 | 0.9677 | 1.0000 | 0.9388 | 0.9574 |

**Table S3. Classification performance of eight bacterial species utilizing the elastic net logistic regression classifier created with hyperspectral ELS data. (n=10).**

|                    | <b>128Ma</b>    | <b>284Mi</b>    | <b>410Mi</b>    | <b>441Mi</b>     | <b>510Ar</b>    | <b>526Ar</b>     | <b>536Cu</b>    | <b>586Cu</b>    |
|--------------------|-----------------|-----------------|-----------------|------------------|-----------------|------------------|-----------------|-----------------|
| <b>Accuracy</b>    | 98.65<br>(0.76) | 98.23<br>(1.57) | 99.48<br>(0.62) | 99.58<br>(0.45)  | 99.48<br>(0.62) | 100.00<br>(0.00) | 98.13<br>(0.97) | 98.33<br>(0.63) |
| <b>Sensitivity</b> | 93.33<br>(5.04) | 95.83<br>(4.96) | 97.50<br>(4.96) | 100.00<br>(0.00) | 97.50<br>(3.45) | 100.00<br>(0.00) | 92.50<br>(6.61) | 90.83<br>(7.07) |
| <b>Specificity</b> | 99.40<br>(0.87) | 98.57<br>(1.53) | 99.76<br>(0.44) | 99.52<br>(0.51)  | 99.76<br>(0.44) | 100.00<br>(0.00) | 98.93<br>(0.79) | 99.40<br>(0.71) |
| <b>PPV</b>         | 96.13<br>(5.60) | 91.27<br>(8.79) | 98.44<br>(2.89) | 96.88<br>(3.34)  | 98.39<br>(2.99) | 100.00<br>(0.00) | 92.77<br>(5.10) | 96.02<br>(4.57) |
| <b>NPV</b>         | 99.06<br>(0.71) | 99.40<br>(0.70) | 99.65<br>(0.70) | 100.00<br>(0.00) | 99.65<br>(0.49) | 100.00<br>(0.00) | 98.94<br>(0.93) | 98.71<br>(0.99) |

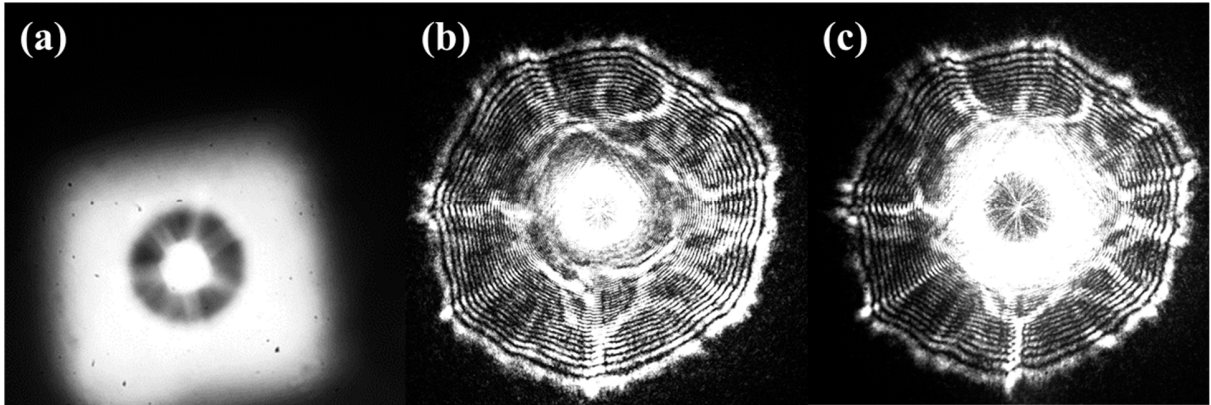

**Figure S6. The light-scatter pattern generation with different coherence properties.**

Three light sources were utilized to create the light-scatter pattern from the *E. coli* K12 colony: (a) LED flashlight as an incoherent light source, (b) 635 nm laser diode as a coherent light source, and (c) HESPI as the unknown.

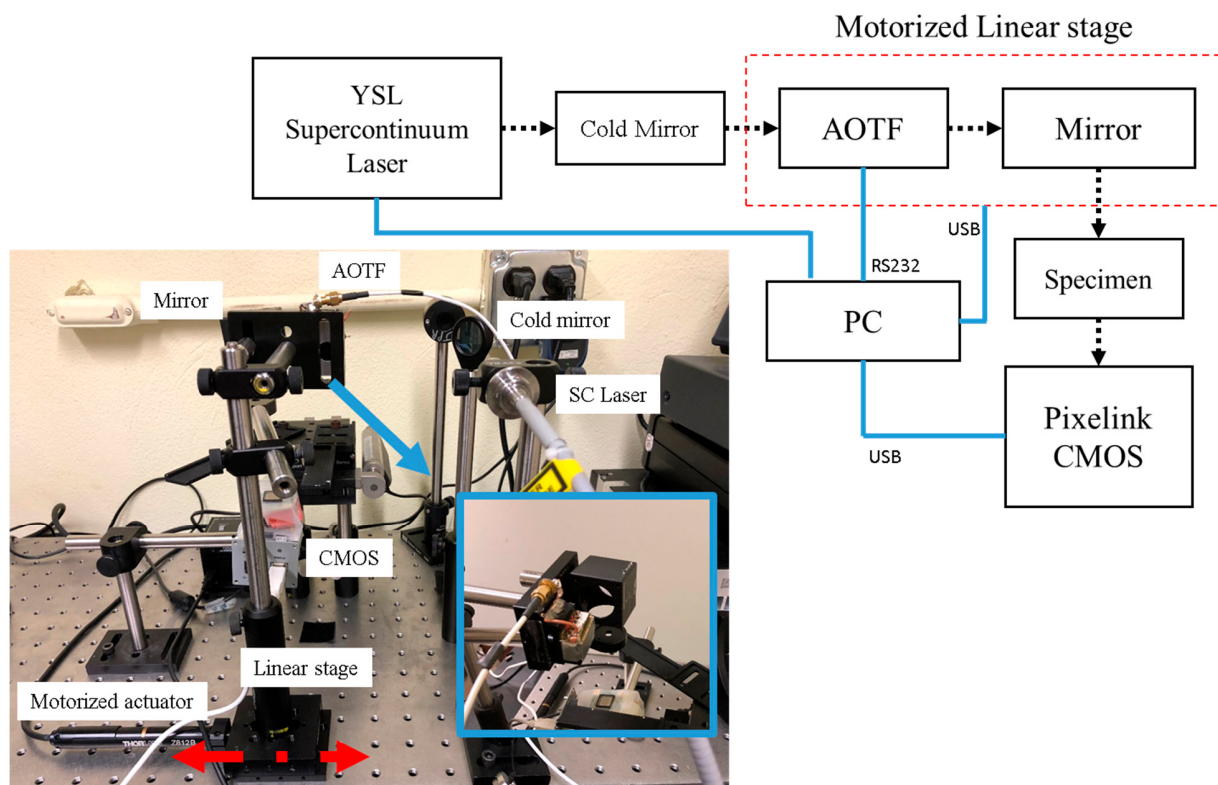

**Figure S7. The schematic diagram and picture of HESPI with a mechanical solution to compensate for the beam spot movement at the imaging plane.**

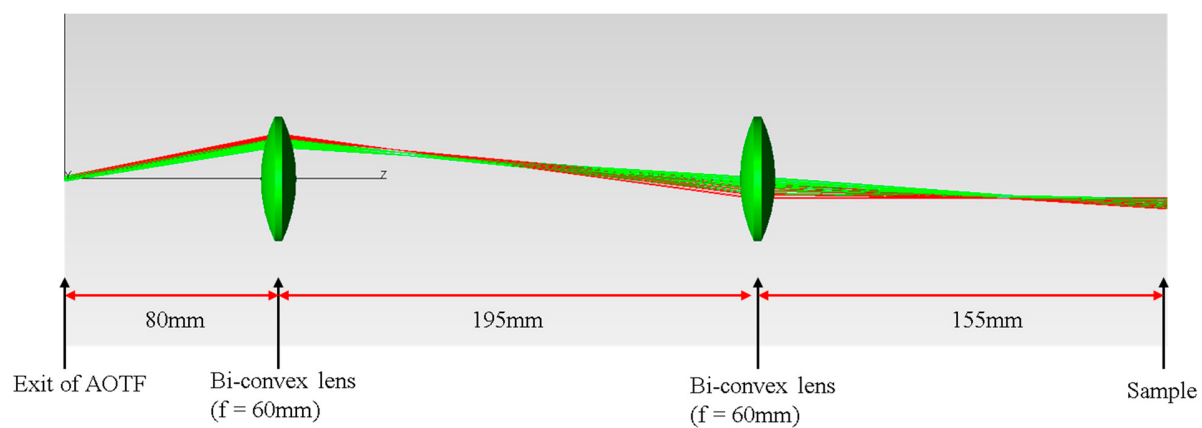

**Figure S8. A simple ray-tracing simulation of multiple lenses implemented in HESPI to minimize the beam spot movement at the imaging plane.**
